# Supplementary material for: SOS del Rey Católico
Source: Royal Society of Chemistry journal article supplement (doi:10.1039/d1cp00206f), 2006-01-01
Supplement: d1cp00206f1.pdf [file d1cp00206f1.pdf]

# Supporting Information: Protein-ligand free energies of binding from full-protein DFT calculations: convergence and choice of exchange-correlation functional

Lennart Gundelach, Thomas Fox, Christofer S. Tautermann, Chris-Kriton Skylaris\*

March 2021

## 1 Further Computational Details

### 1.1 Input and Output files: <https://github.com/gundelach/ESI-PCCP>

All original input files for the DFT calculations in ONETEP, dispersion calculations in dftd3, normal mode calculations in AMBER and GFN2-XTB calculations in XTB are provided in the public GitHub repository:

<https://github.com/gundelach/ESI-PCCP>

Raw output files are also provided where appropriate. For details of the files provided, please consult the README documentation included with the files.

### 1.2 ONETEP Background

While traditional density functional theory scales cubically with the number of electrons in the system, linearly-scaling versions of DFT have been developed. The ONETEP, code [1] is one such linear-scaling DFT implementation. To achieve linear-scaling, the one-particle electron density matrix, which decays exponentially with distance, is truncated. Effectively, the electronic density is localized in space. In ONETEP this is achieved by representing localized orbitals by non-orthogonal generalized Wannier functions (NGWFs). As part of the self-consistent minimization, both the non-local orbitals as well as the electron density are optimized. The parallelization strategy of ONETEP exploits this locality and can spread individual atoms over many simultaneous processes. A hybrid MPI-OMP parallelization allows for efficient and scalable distribution of the workload. MPI processes split up the system into individual or groups of atoms and which spawn multiple OMP threads for each required computation.

The ONETEP implicit solvation model is a minimal-parameter Poisson-Boltzmann (PB) based model which is implemented self-consistently as part

of the DFT calculation[2]. The solute cavity is constructed from iso-surfaces of the electronic-density with a smooth transition between the bulk dielectric constant and the interior of the solute. Using the electronic density to construct the cavity reduces the number of empirical parameters. Because the PB equation is solved self-consistently, the implicit solvent can alter the electron density. The smeared-ion formalism is used to model nuclear cores and is controlled by a single parameter. The non-polar term of the solvation energy is calculated from the surface area of the iso-surfaces used to construct the cavity. The solvent accessible surface area (SASA) is multiplied by the physical surface tension of the solvent,  $\gamma$ , and scaled by an empirical factor of 0.28 to approximately include dispersion-repulsion between the solvent and solute

### 1.3 Cavity-correction

Both the minimal-parameter PBSA solvent-model implemented in ONETEP, as well as the PBSA solvent used at MM-level, incorrectly handle the buried cavity in T4-lysozyme (L99A/M102Q). This is a known issue for solvent models based on the solvent accessible surface area described in detail in 2010 by Genheden et al. [3] and in 2014 by Fox et al. [4]. In the un-complexed protein calculation, i.e the host, the surface area of the interior of the buried binding site is counted towards the solvent accessible surface area (SASA) used to calculate the non-polar solvation term. Thus, the non-polar term of just the protein is larger than that of the complex indicating the formation of a larger cavity in the solvent. Conceptually, the SASA model creates an additional, fictitious, cavity in the solvent with the SASA of the buried binding site. Because the non-polar term of both the protein and complex are known, a post-hoc cavity-correction may be applied to remove the additional contribution of the buried cavity to the non-polar solvation energy. By subtracting the difference in the non-polar terms of the host and complex from the host solvation energy, the spurious cavitation energy is removed. If the cavity should be filled with water, as is the case for this T4-lysozyme mutant (L99A/M102Q) [5], this correction is applied a second time to remove the cavity SASA from the host SASA. This is necessary because a water filled cavity reduces the volume of the cavity formed for the solute in the solvent.

This simple approach works immediately for the original MM-PBSA calculations, which used a simplistic SASA model with no estimate of the dispersion and repulsion between the solvent and solute (npopt=1 in Amber10). In the QM calculations, dispersion/repulsion is also included in the non-polar term. Because the cavity SASA does represent a physical boundary between solvent and solute inside the buried cavity, the dispersion-repulsion due to the cavity SASA term is physically correct. Since the non-polar dispersion in ONETEP is just a scaling factor applied to the non-polar term, it can be separated out and only the excess cavitation energy removed from the host non-polar solvation term. A full derivation is provided in [4].

## 1.4 ONETEP Settings

A kinetic energy cutoff of 800eV was used for all functionals. 4 NGWFs were used for Carbon, Nitrogen and Oxygen and 1 NGWF was used for Hydrogen. For Sulfur and Fluorine 9 NGWFs were used. An NGWF radius of  $8a_0$  was used throughout. The Pseudoatomic Solver was used in ONETEP to generate the initial NGWFs. ONETEP default parameters for water at room temperature were used. The default solvent surface tension is  $4.7624 \times 10^{-5} \text{Ha/Bohr}^2$  with an apolar scaling factor of 0.281075 and a solvation  $\beta$  of 1.3. The bulk permittivity was 78.54 and an interior dielectric of 1 was used. To speed up the solution of the Poisson-Boltzmann equation, the charge at the boundary of the simulation cell was coarse-grained. The default charge coarse-graining factor at the boundary is 5, but by increasing this to 10, the energy evaluation of the complex is sped up by 20%. In a series of test calculations, increasing the coarse-graining to 10 resulted in a change of only 0.005 kcal/mol in the total energy in solvent and 0.01 kcal/mol in the binding energies. ONETEP version 5.3.2.6 compiled with the Intel 2019 compilers and Intel MPI 2019 was used.

## 2 Data and Figures

### 2.1 Standard Error of the Mean

#### 2.1.1 Enthalpy, Ligand Set B; 100 snapshots; PBE, MM, GFN2-XTB

Figures 1-7: The standard error of the mean (SEM) calculated by bootstrapping (1000 re-samples) of the change upon binding in the gas-phase energy,  $\langle \Delta E \rangle$ , solvation energy,  $\langle \Delta G_{solvation} \rangle$ , cavity-corrected solvation energy,  $\langle \Delta G_{solvation-cav-cor} \rangle$ , and total enthalpy,  $\langle \Delta H_{bind} \rangle = \langle \Delta E \rangle + \langle \Delta G_{solvation} \rangle$ , for each ligand up to 100 snapshots for MM, the DFT functional PBE and the SEQM method GFN2-XTB.

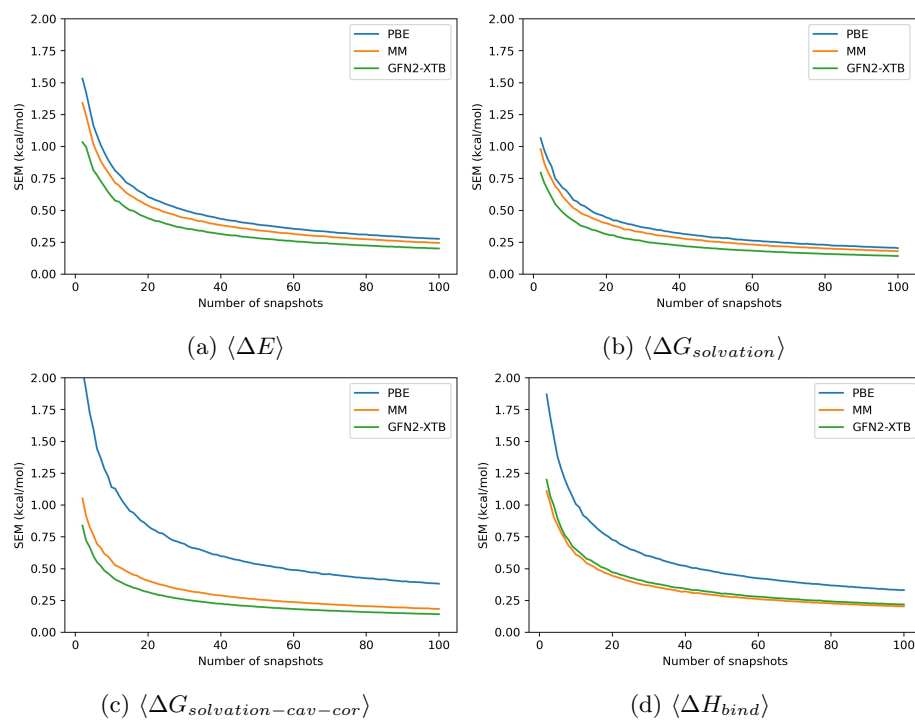

Figure 1: catechol



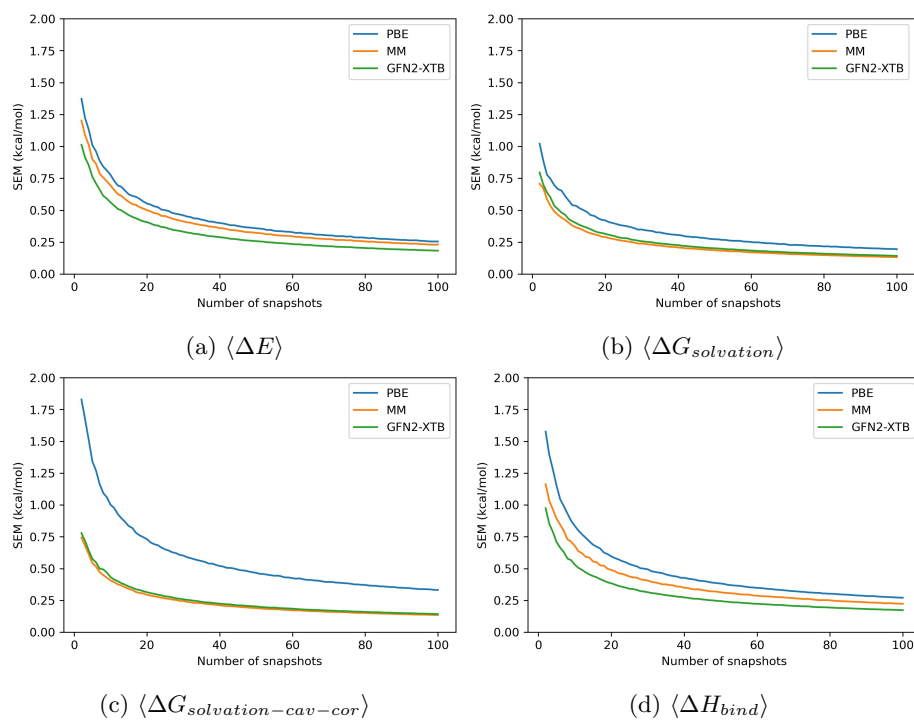

Figure 2: phenol

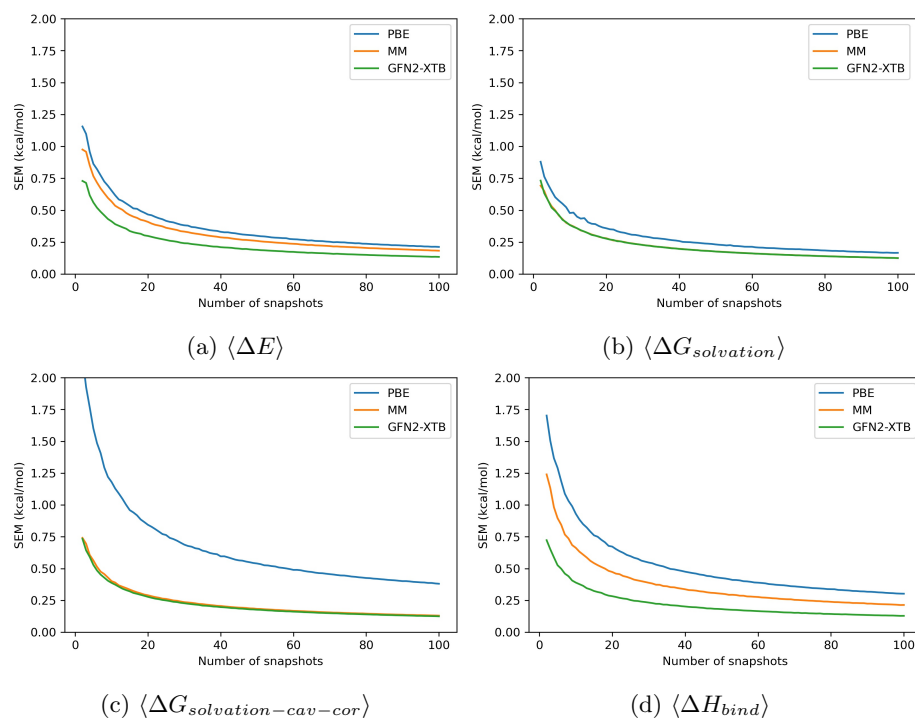

Figure 3: fluoroaniline

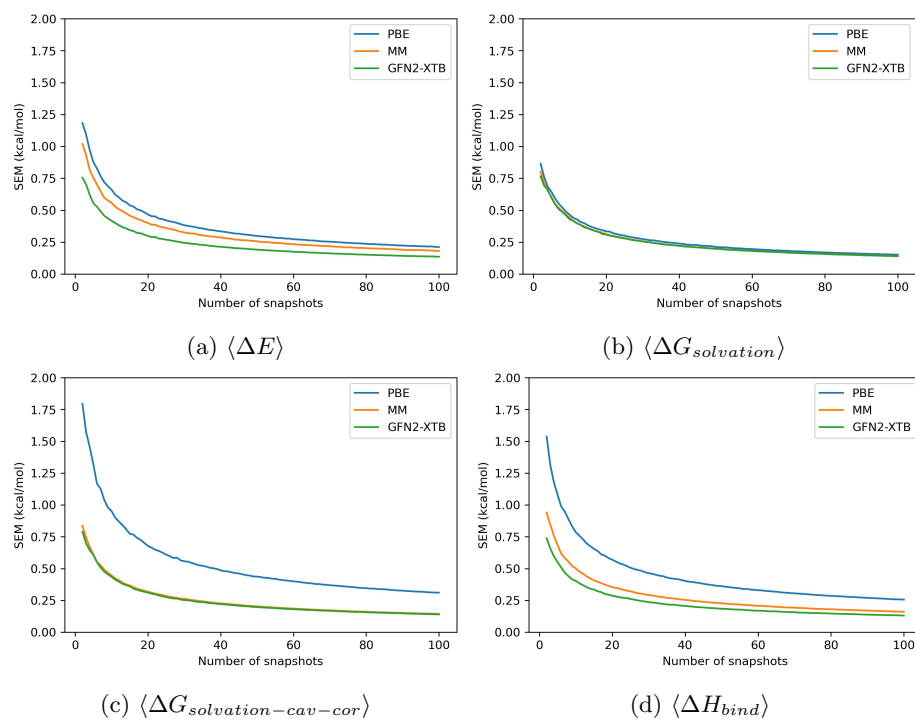

Figure 4: methylphenol

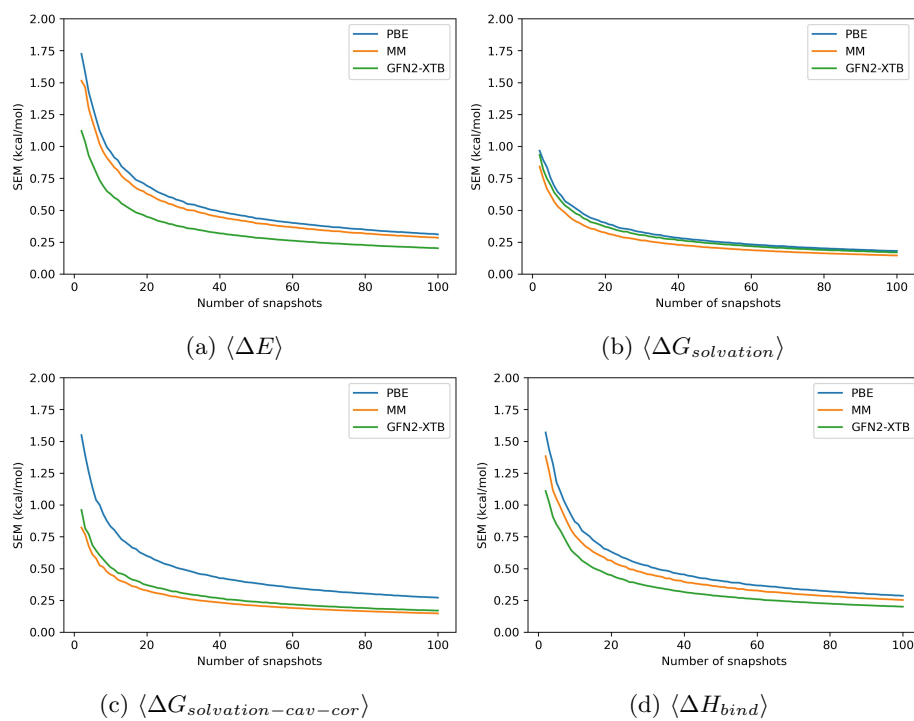

Figure 5: hydroxyaniline

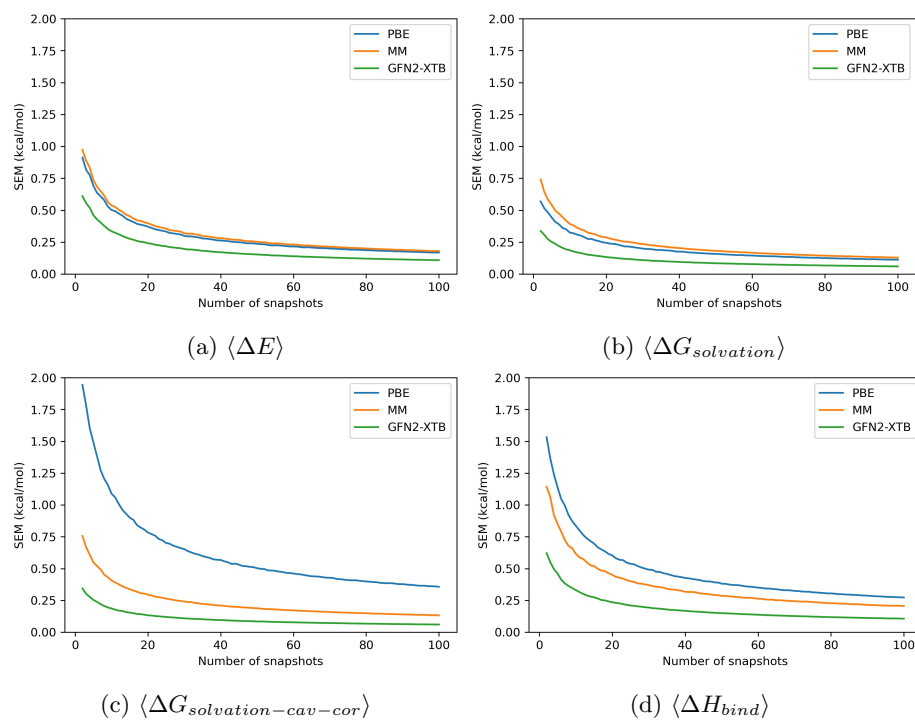

Figure 6: toluene

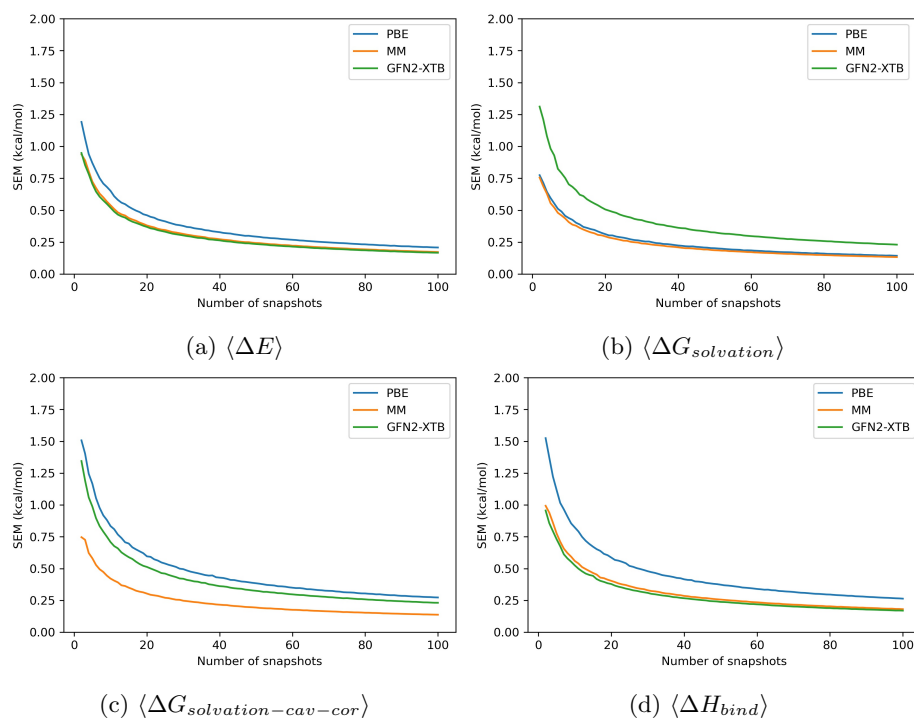

Figure 7: chlorophenol

### 2.1.2 Entropic components

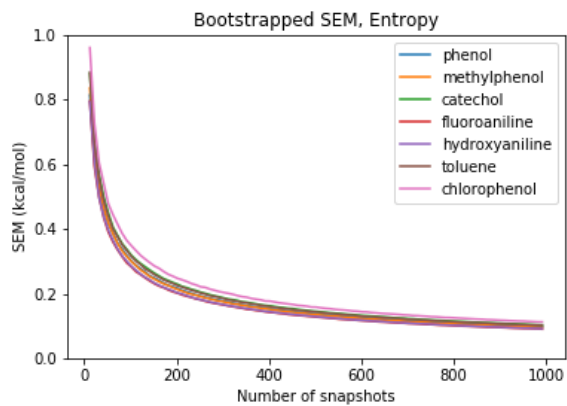

Figure 8: Bootstrapped (1000 re-samples) SEM of entropy correction term,  $T \times \langle \Delta S \rangle$ , up to 100 snapshots for each ligand.

## 2.2 Mean enthalpy change and absolute deviations

### 2.2.1 Equally Spaced Snapshots

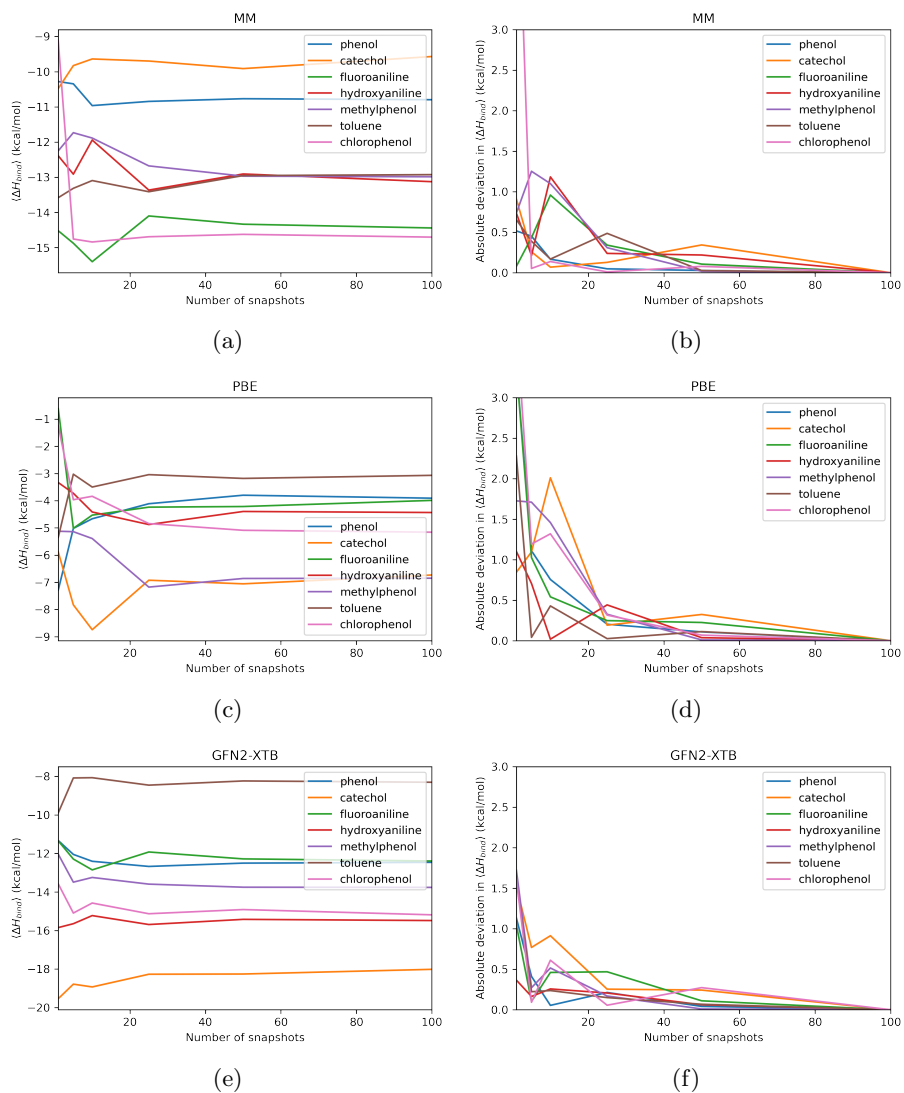

Figure 9: Left: Mean change in total enthalpy upon binding,  $\langle \Delta H_{bind} \rangle$ , of each ligand at different numbers of equally spaced snapshots. Right: Absolute deviation of  $\langle \Delta H_{bind} \rangle$  at different numbers of equally spaced snapshots from the 'converged' mean over 100 snapshots. Methods: MM (a,b), DFT(PBE) (c,d), GFN2-XTB (e,f).

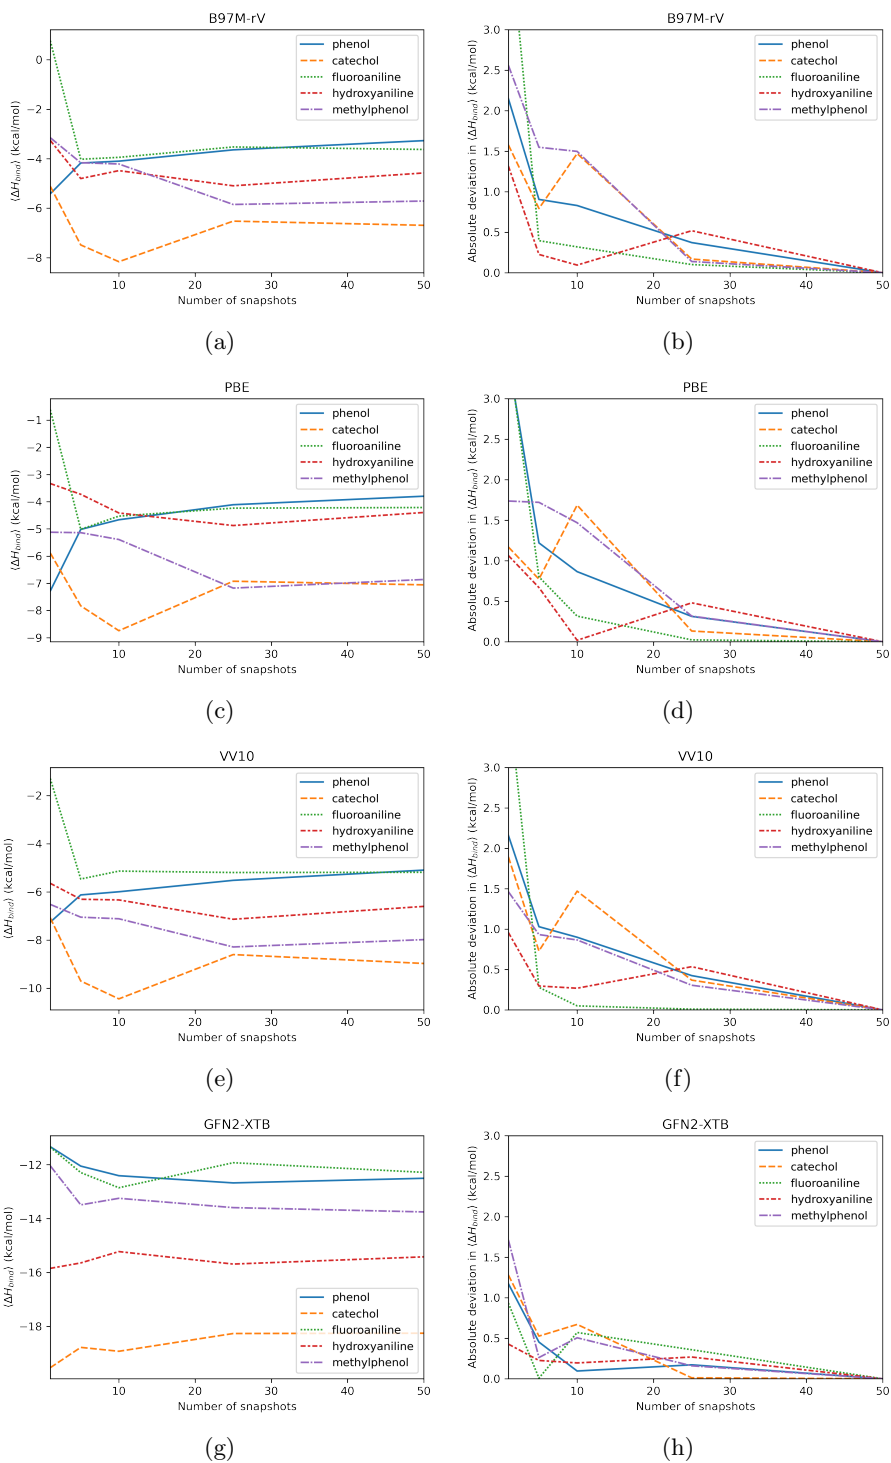

Figure 10: Left: Mean change in total enthalpy upon binding,  $\langle \Delta H_{bind} \rangle$ , of each ligand at different numbers of equally spaced snapshots. Right: Absolute deviation of  $\langle \Delta H_{bind} \rangle$  at different numbers of equally spaced snapshots from the 'converged' mean over 50 snapshots. Methods: B97M-rV (a,b), PBE (c,d), VV10 (e,f), GFN2-XTB (g,h).



## 2.2.2 Randomly selected Snapshots

Figures 11-17: Absolute deviation of  $\langle \Delta H_{bind} \rangle$  at different numbers of randomly selected snapshots from the 'converged' mean over 100 snapshots. Two different sets of random snapshots shown in blue and orange.

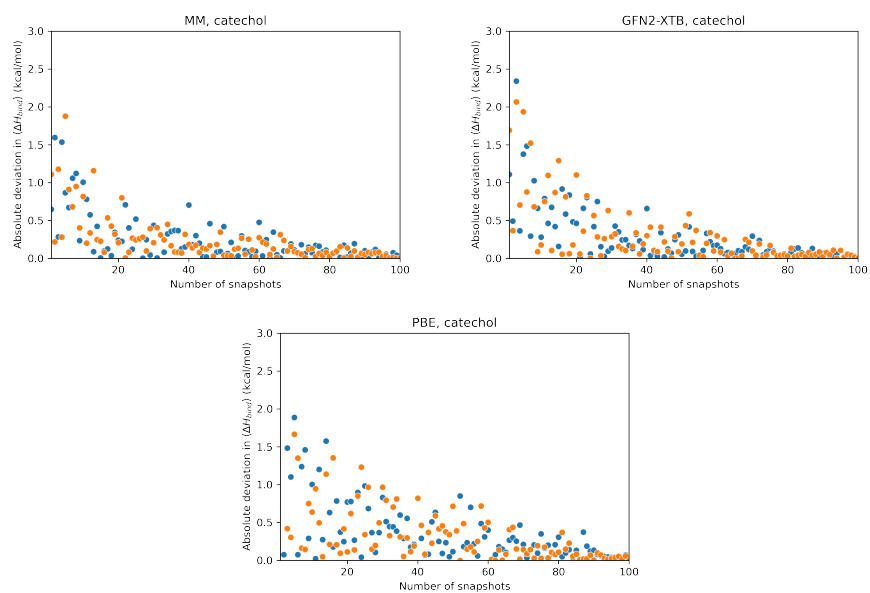

Figure 11: catechol

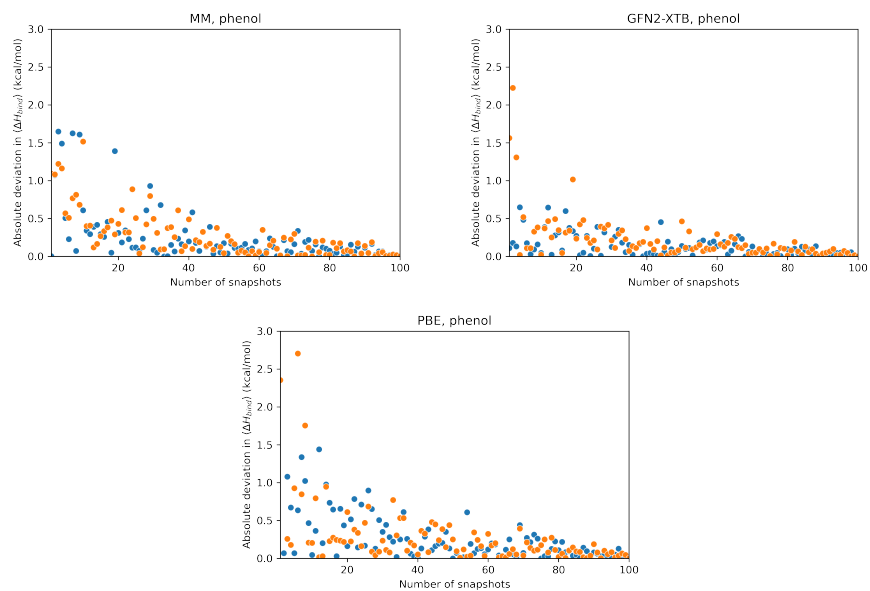

Figure 12: phenol

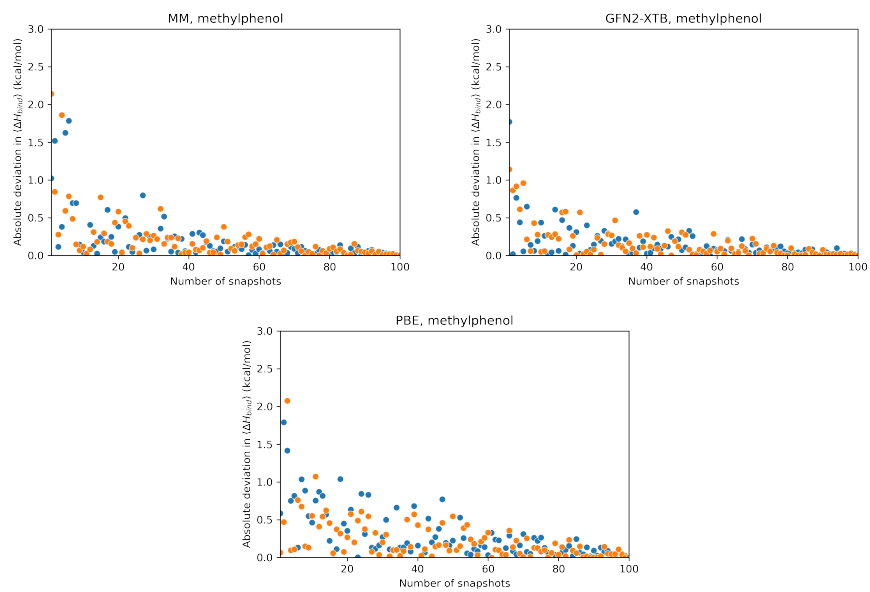

Figure 13: methylphenol

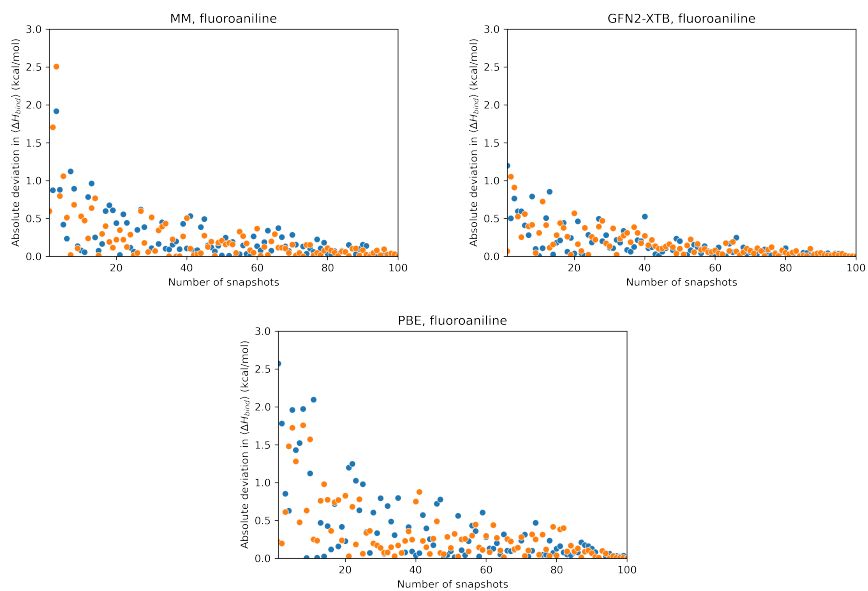

Figure 14: fluoroaniline

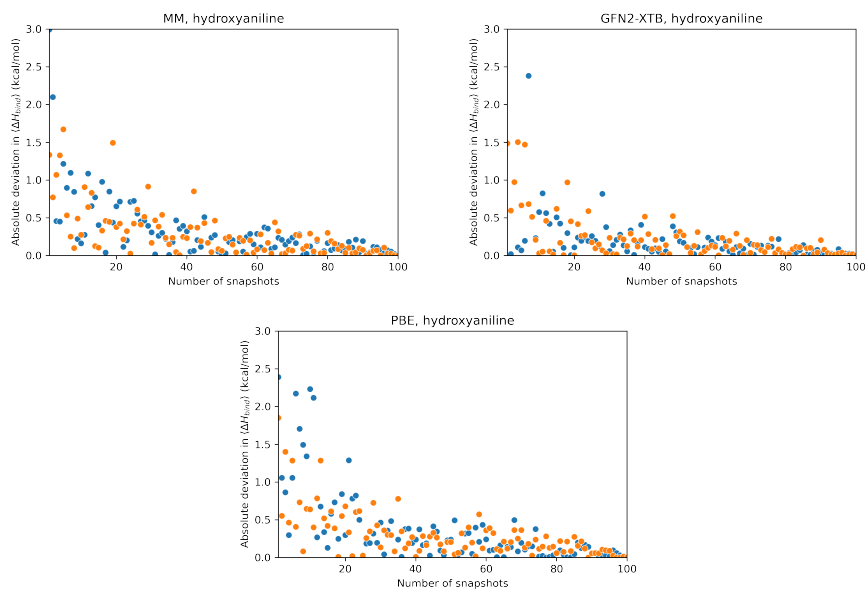

Figure 15: hydroxyaniline

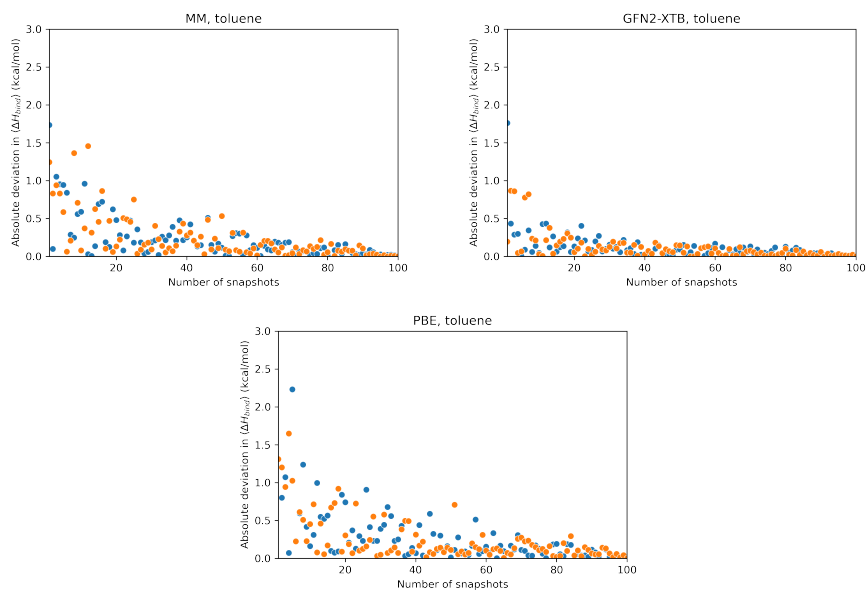

Figure 16: toluene

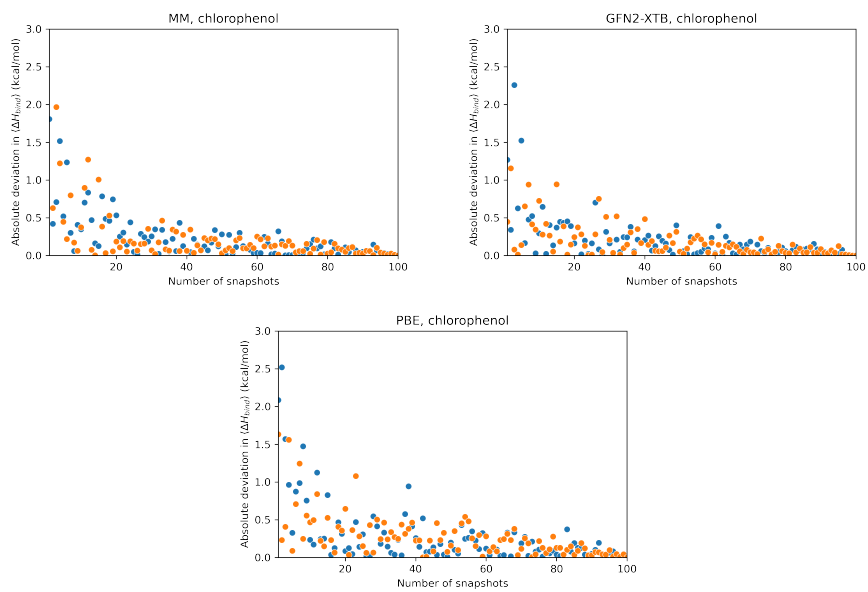

Figure 17: chlorophenol

## 2.3 RMSDtr with Entropy Sampling

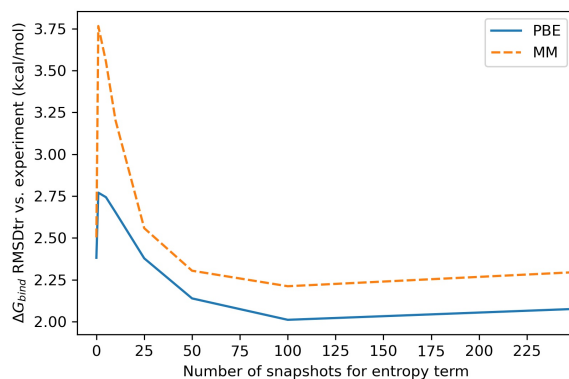

Figure 18: Root mean square error deviation from experiment after removal of mean signed error (kcal/mol) of calculated binding free energies for ligand set B, at different levels of entropy sampling. Enthalpy sampled over 100 snapshots. RMSDtr calculated with upper limit for non-binder.

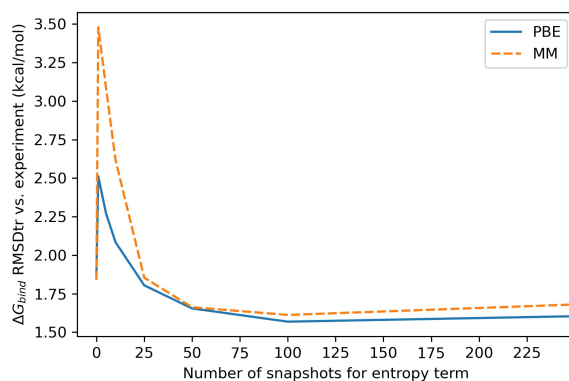

Figure 19: Root mean square error deviation from experiment after removal of mean signed error (kcal/mol) of calculated binding free energies for ligand set B, at different levels of entropy sampling. Enthalpy sampled over 100 snapshots. RMSDtr calculated with lower limit for non-binder.

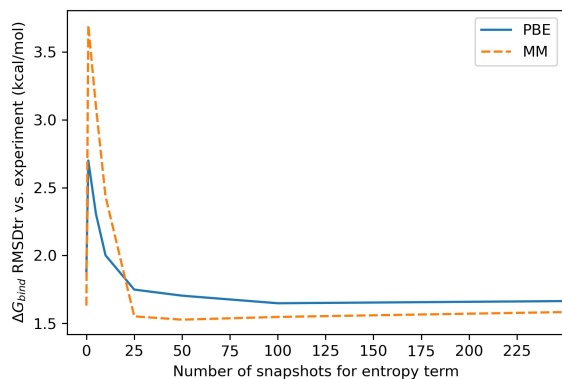

Figure 20: Root mean square error deviation from experiment after removal of mean signed error (kcal/mol) of calculated binding free energies for ligand set B, at different levels of entropy sampling. Enthalpy sampled over 100 snapshots. RMSDtr calculated with binders only.

## 2.4 RMSDtr convergence

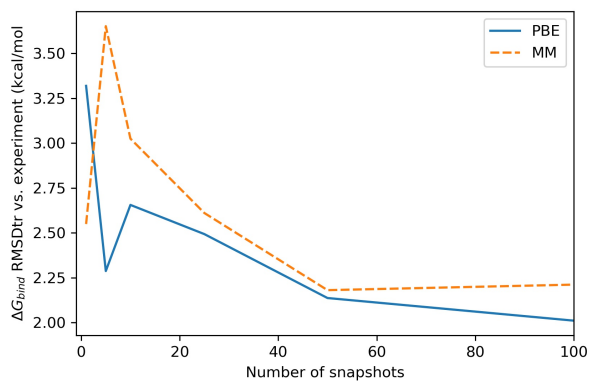

Figure 21: Root mean square error deviation from experiment after removal of mean signed error (kcal/mol) of calculated binding free energies for ligand set B, at different levels of entropy and energy sampling. Enthalpy and energy sampled over same snapshots. RMSDtr calculated with upper limit for non-binder.

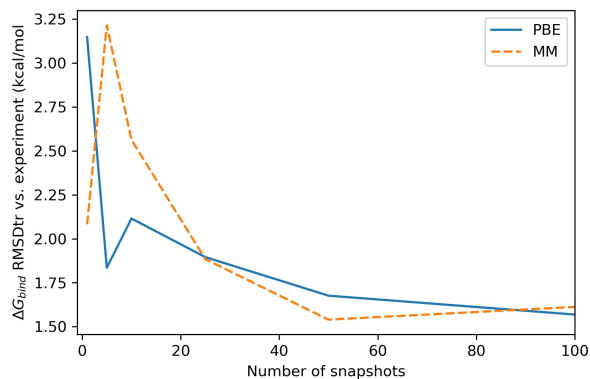

Figure 22: Root mean square error deviation from experiment after removal of mean signed error (kcal/mol) of calculated binding free energies for ligand set B, at different levels of entropy and energy sampling. Enthalpy and energy sampled over same snapshots. RMSDtr calculated with lower limit for non-binder.

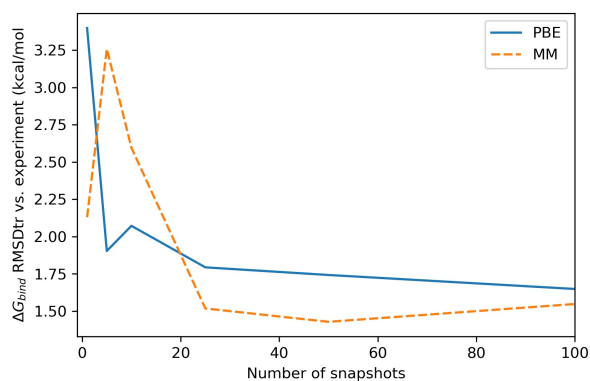

Figure 23: Root mean square error deviation from experiment after removal of mean signed error (kcal/mol) of calculated binding free energies for ligand set B, at different levels of entropy and energy sampling. Enthalpy and energy sampled over same snapshots. RMSDtr calculated with binders only.

## 2.5 Analysis of Trajectories

### 2.5.1 1D RMSD

One dimensional RMSD (Ångstrom) plots with respect to first snapshot of MD trajectory for each ligand in complex with (L99A/M102Q).

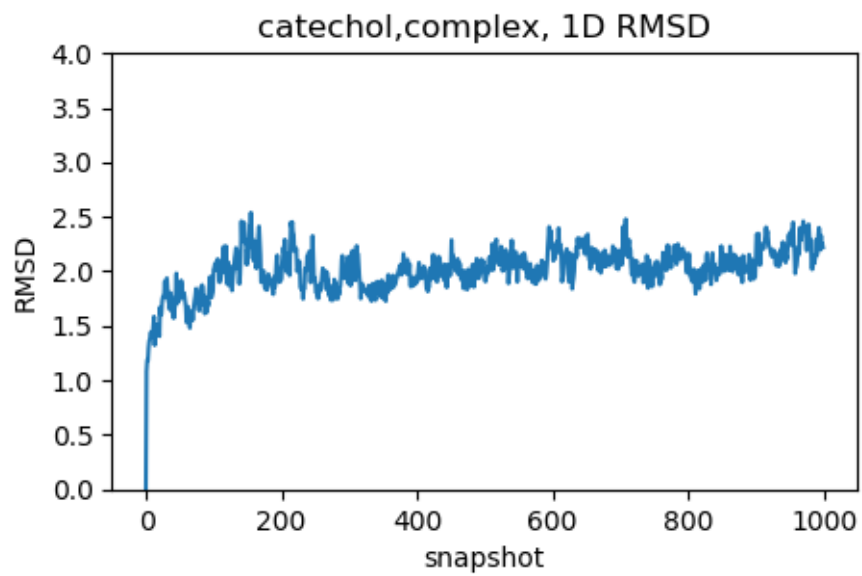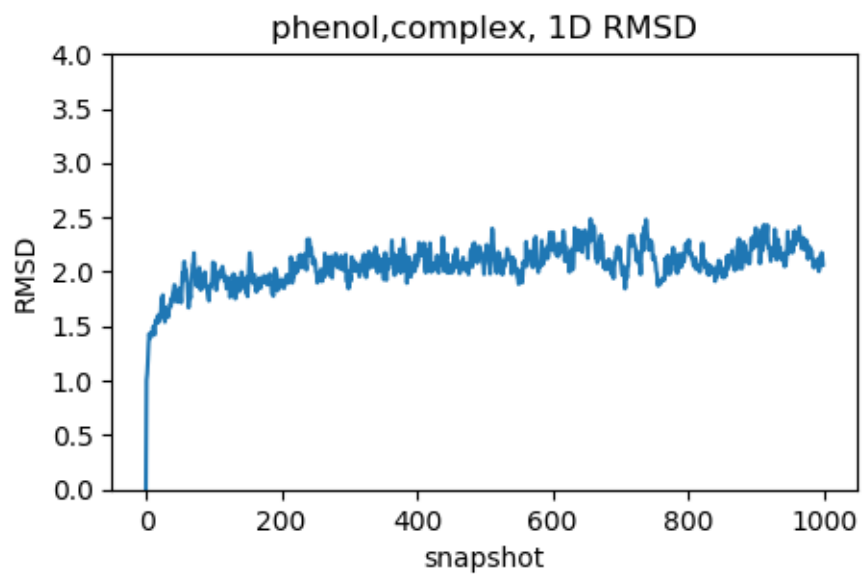



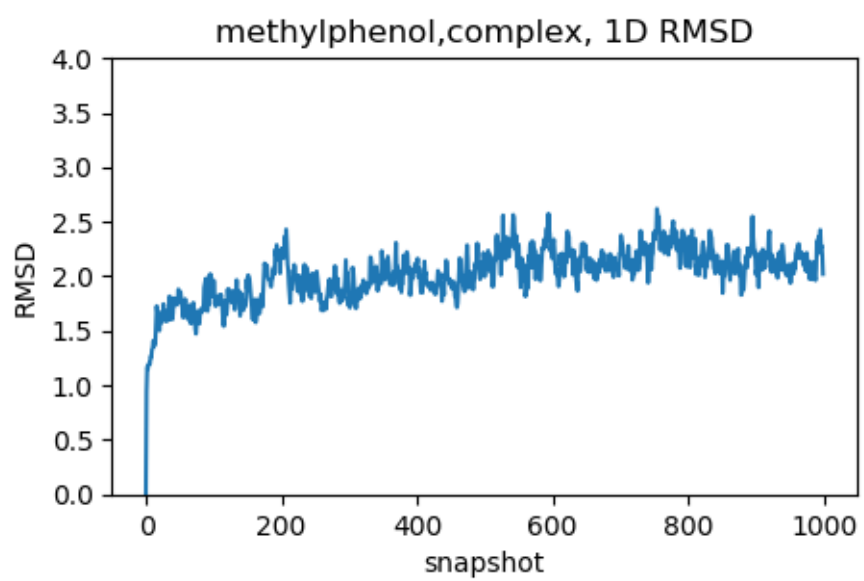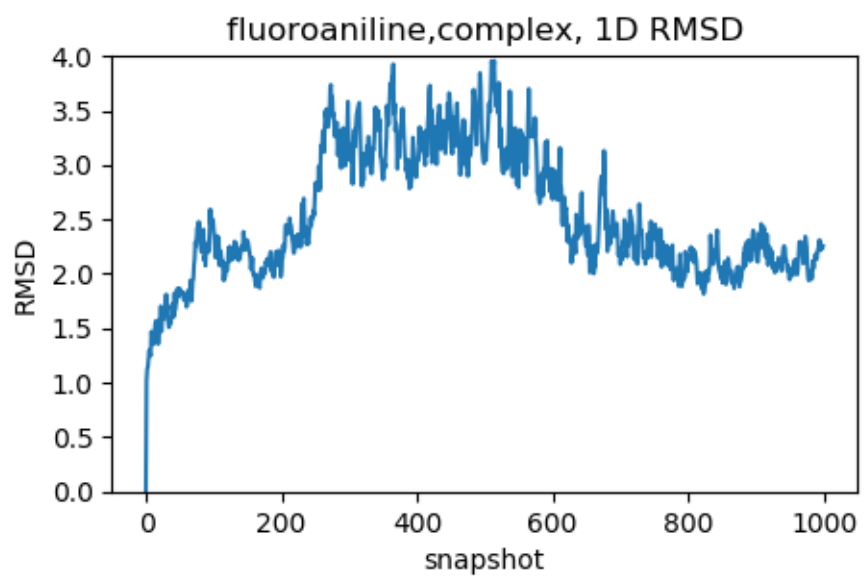

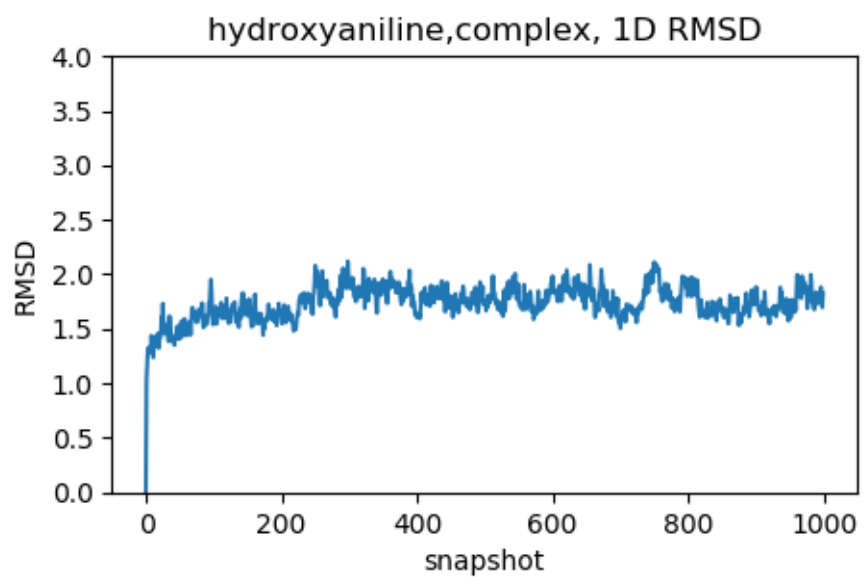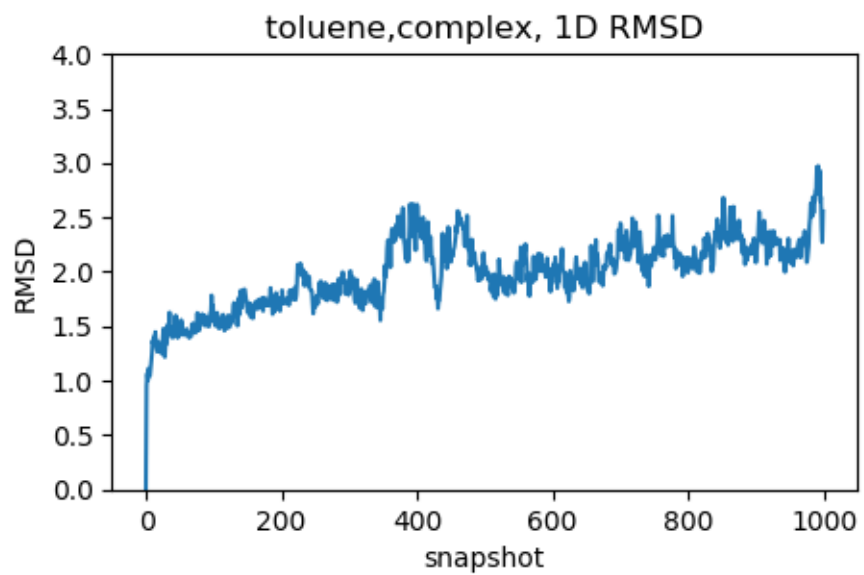

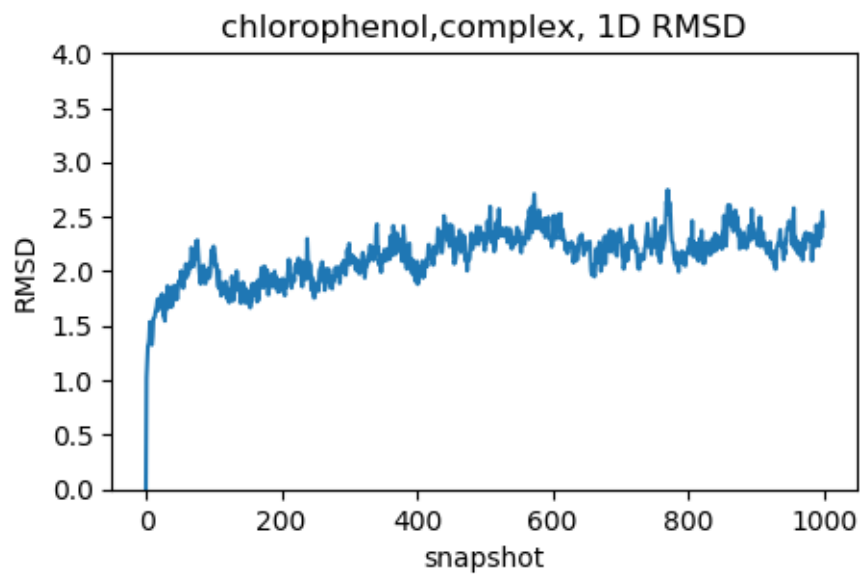

### 2.5.2 2D RMSD

Heatmaps of 2D RMSD (Ångstrom) of MD trajectories for each ligand in complex with T4-lysozyme (L99A/M102Q).

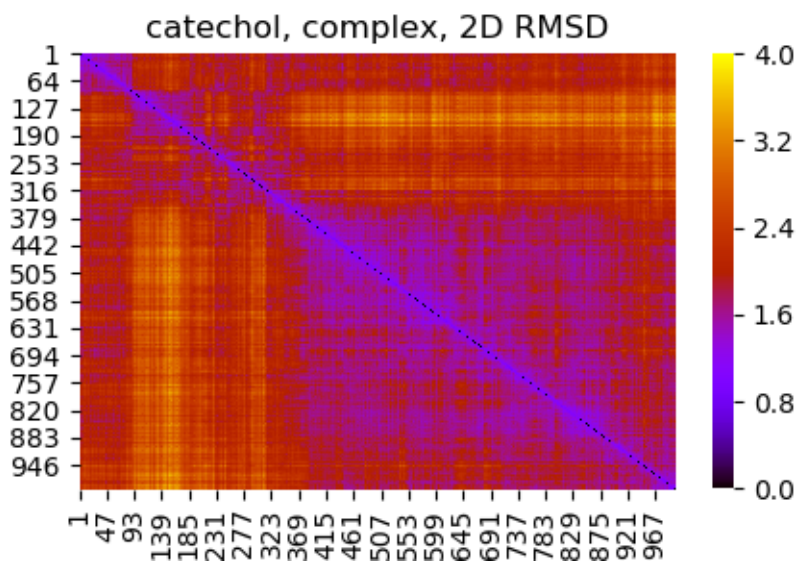

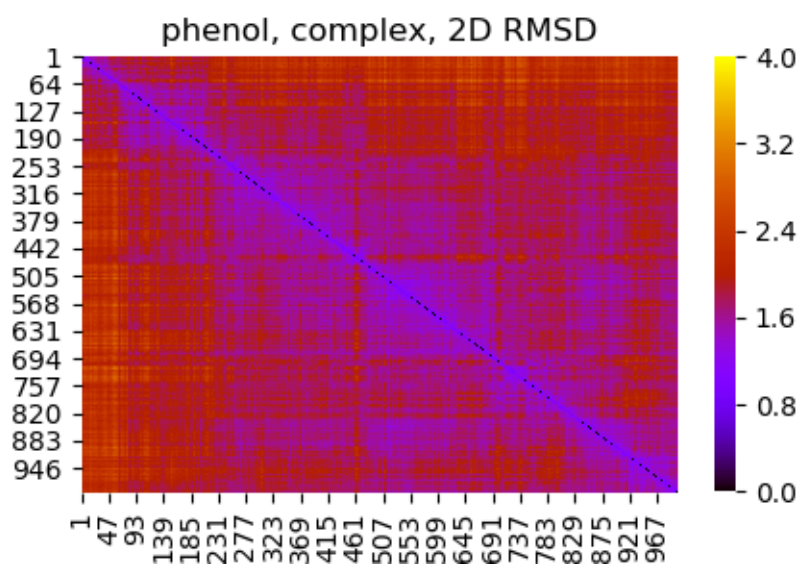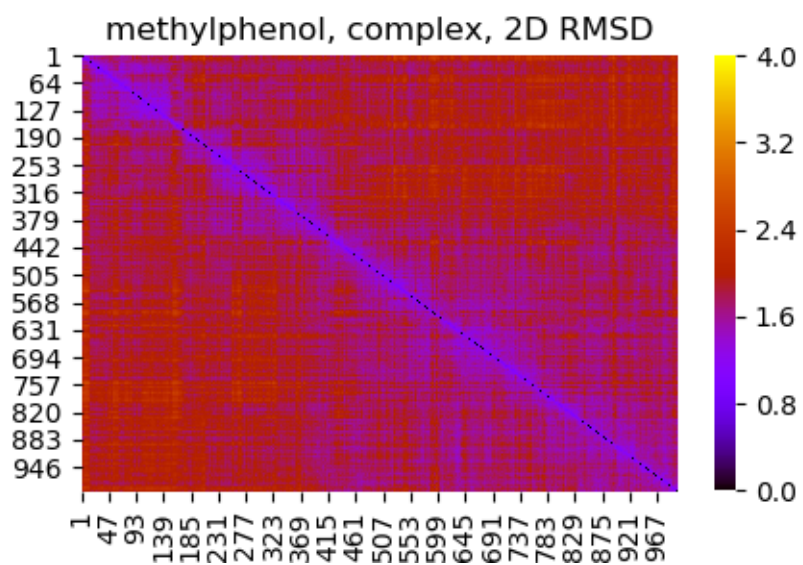

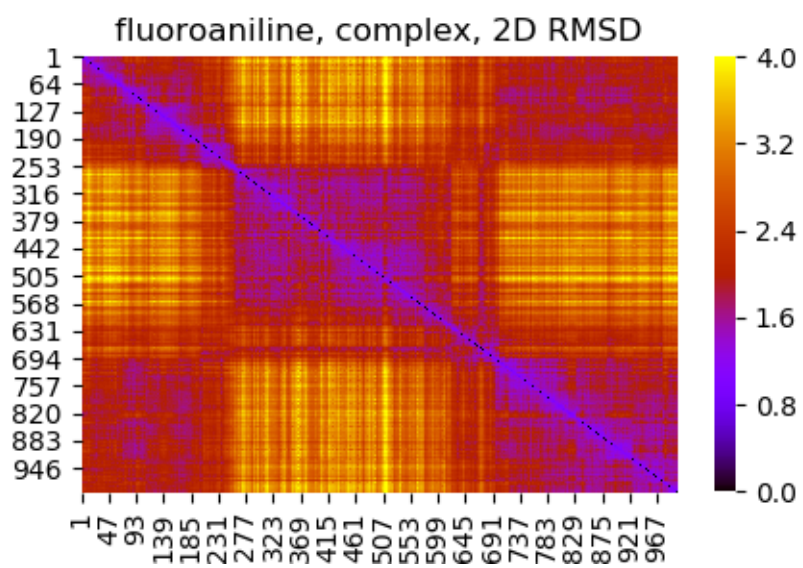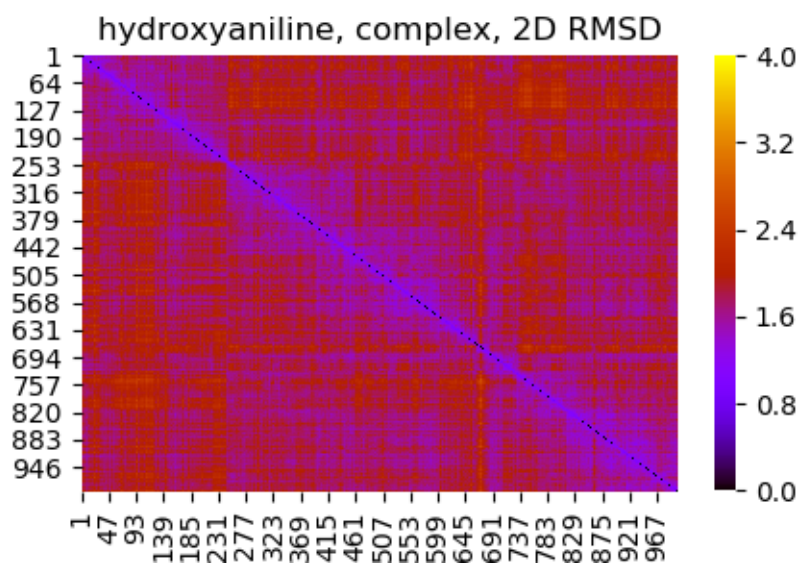

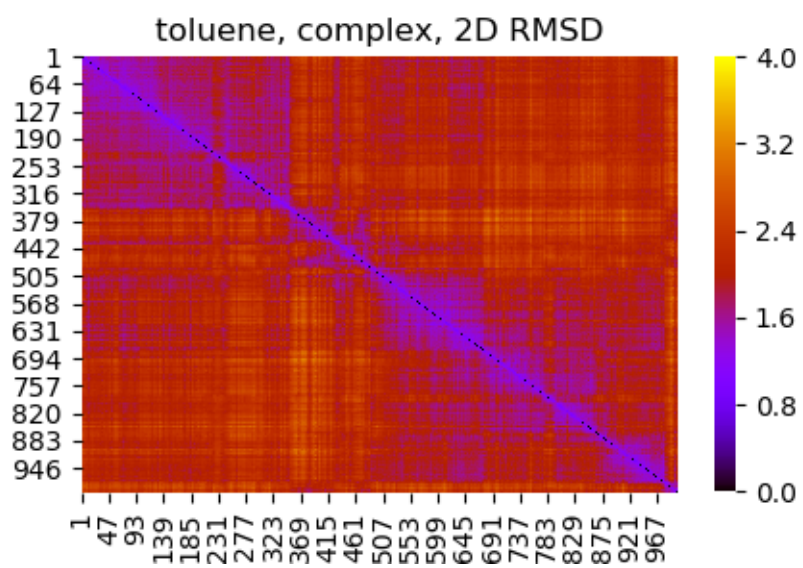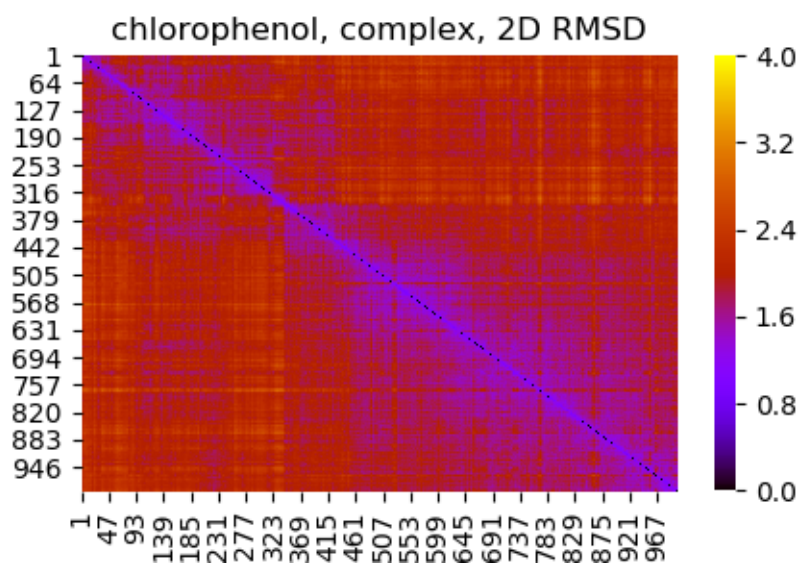

### 2.5.3 RMSD filter

| Reference Ligand | RMSE with and without RMSD filter |          |               |              |         |              |
|------------------|-----------------------------------|----------|---------------|--------------|---------|--------------|
|                  | phenol                            | catechol | fluoroaniline | methylphenol | toluene | chlorophenol |
| PBE              | 2.79                              | 3.09     | 3.19          | 2.57         | 3.36    | 2.30         |
| PBE_3.0          | 2.59                              | 2.86     | 3.02          | 2.49         | 3.28    | 2.20         |
| MM               | 3.53                              | 4.22     | 2.53          | 2.56         | 2.54    | 2.86         |
| MM_3.0           | 3.39                              | 4.41     | 2.54          | 2.55         | 2.53    | 2.85         |

Table 1: Root mean square error (RMSE) of entropy-corrected binding free energies relative to each reference ligand against experiment with and without a 3 Ångstrom RMSD filter for PBE and MM at 100 snapshots (Ligand set B).

## 2.6 Energy Components

Each table contains the main energy and entropy components for each ligand. The gas-phase energy  $E$  contains the empirical dispersion correction  $Emp\_Disp$ .  $G\_bind$  with and without entropy term given. Entropy term is  $T\Delta S$ .



### 2.6.1 Ligand set A

| Phenol          | E       | G_solv | G_solv_corrected | G_bind  | Emp_Dis | Entropy | G_bind_with_Entropy |
|-----------------|---------|--------|------------------|---------|---------|---------|---------------------|
| PBE+ONETEP_DISP | -28.335 | 3.143  | 24.535           | -3.800  | -22.304 | -14.219 | 10.419              |
| PBE.bj          | -26.541 | 3.143  | 24.535           | -2.006  | -20.511 | -14.219 | 12.213              |
| PBE.bjm         | -25.774 | 3.143  | 24.535           | -1.240  | -19.744 | -14.219 | 12.979              |
| PBE_zero        | -27.892 | 3.143  | 24.535           | -3.358  | -21.862 | -14.219 | 10.862              |
| PBE_old         | -26.397 | 3.143  | 24.535           | -1.862  | -20.366 | -14.219 | 12.357              |
| PBE_zerom       | -24.616 | 3.143  | 24.535           | -0.081  | -18.585 | -14.219 | 14.138              |
| PBE_elstner     | -28.335 | 3.143  | 24.535           | -3.800  | -22.304 | -14.219 | 10.419              |
| PBE.bj_abc      | -24.364 | 3.143  | 24.535           | 0.170   | -18.334 | -14.219 | 14.389              |
| PBE.bjm_abc     | -23.598 | 3.143  | 24.535           | 0.937   | -17.567 | -14.219 | 15.156              |
| B97M-V          | -29.665 | 3.096  | 26.395           | -3.270  | 0.000   | -14.219 | 10.950              |
| VV10            | -30.825 | 2.812  | 25.730           | -5.095  | 0.000   | -14.219 | 9.124               |
| MM              | -25.834 | 14.491 | 15.066           | -10.769 | 0.000   | -14.219 | 3.450               |
| Catechol        | E       | G_solv | G_solv_corrected | G_bind  | Emp_Dis | Entropy | G_bind_with_Entropy |
| PBE+ONETEP_DISP | -36.851 | 7.040  | 29.793           | -7.057  | -23.413 | -14.615 | 7.558               |
| PBE.bj          | -35.236 | 7.040  | 29.793           | -5.443  | -21.799 | -14.615 | 9.173               |
| PBE.bjm         | -34.433 | 7.040  | 29.793           | -4.639  | -20.995 | -14.615 | 9.976               |
| PBE_zero        | -36.769 | 7.040  | 29.793           | -6.976  | -23.332 | -14.615 | 7.640               |
| PBE_old         | -34.963 | 7.040  | 29.793           | -5.170  | -21.526 | -14.615 | 9.446               |
| PBE_zerom       | -33.200 | 7.040  | 29.793           | -3.407  | -19.763 | -14.615 | 11.208              |
| PBE_elstner     | -36.851 | 7.040  | 29.793           | -7.057  | -23.413 | -14.615 | 7.558               |
| PBE.bj_abc      | -33.028 | 7.040  | 29.793           | -3.235  | -19.591 | -14.615 | 11.381              |
| PBE.bjm_abc     | -32.224 | 7.040  | 29.793           | -2.431  | -18.787 | -14.615 | 12.184              |
| B97M-V          | -38.599 | 7.179  | 31.907           | -6.692  | 0.000   | -14.615 | 7.923               |
| VV10            | -40.127 | 6.737  | 31.156           | -8.970  | 0.000   | -14.615 | 5.645               |
| MM              | -36.297 | 25.792 | 26.384           | -9.913  | 0.000   | -14.615 | 4.702               |
| Methylphenol    | E       | G_solv | G_solv_corrected | G_bind  | Emp_Dis | Entropy | G_bind_with_Entropy |
| PBE+ONETEP_DISP | -30.854 | 2.304  | 23.993           | -6.860  | -24.120 | -15.772 | 8.911               |
| PBE.bj          | -29.026 | 2.304  | 23.993           | -5.032  | -22.292 | -15.772 | 10.739              |
| PBE.bjm         | -28.067 | 2.304  | 23.993           | -4.074  | -21.334 | -15.772 | 11.698              |
| PBE_zero        | -30.732 | 2.304  | 23.993           | -6.738  | -23.998 | -15.772 | 9.034               |
| PBE_old         | -28.649 | 2.304  | 23.993           | -4.656  | -21.915 | -15.772 | 11.116              |
| PBE_zerom       | -26.850 | 2.304  | 23.993           | -2.857  | -20.117 | -15.772 | 12.915              |
| PBE_elstner     | -30.854 | 2.304  | 23.993           | -6.860  | -24.120 | -15.772 | 8.911               |
| PBE.bj_abc      | -26.645 | 2.304  | 23.993           | -2.652  | -19.912 | -15.772 | 13.120              |
| PBE.bjm_abc     | -25.687 | 2.304  | 23.993           | -1.693  | -18.953 | -15.772 | 14.079              |
| B97M-V          | -32.750 | 2.793  | 27.039           | -5.711  | 0.000   | -15.772 | 10.061              |
| VV10            | -33.642 | 1.792  | 25.661           | -7.981  | 0.000   | -15.772 | 7.791               |
| MM              | -28.466 | 14.737 | 15.498           | -12.968 | 0.000   | -15.772 | 2.803               |



| Fluoroaniline   | E       | G_solv | G_solv_corrected | G_bind  | Emp_Dis | Entropy | G_bind_with_Entropy |
|-----------------|---------|--------|------------------|---------|---------|---------|---------------------|
| PBE+ONETEP_DISP | -27.042 | 2.075  | 22.826           | -4.216  | -22.363 | -15.374 | 11.158              |
| PBE_bj          | -25.296 | 2.075  | 22.826           | -2.469  | -20.617 | -15.374 | 12.905              |
| PBE_bjm         | -24.452 | 2.075  | 22.826           | -1.625  | -19.773 | -15.374 | 13.749              |
| PBE_zero        | -26.895 | 2.075  | 22.826           | -4.069  | -22.216 | -15.374 | 11.305              |
| PBE_old         | -25.354 | 2.075  | 22.826           | -2.528  | -20.675 | -15.374 | 12.846              |
| PBE_zerom       | -23.327 | 2.075  | 22.826           | -0.500  | -18.648 | -15.374 | 14.874              |
| PBE_elstner     | -27.042 | 2.075  | 22.826           | -4.216  | -22.363 | -15.374 | 11.158              |
| PBE_bj_abc      | -23.191 | 2.075  | 22.826           | -0.365  | -18.512 | -15.374 | 15.009              |
| PBE_bjm_abc     | -22.347 | 2.075  | 22.826           | 0.480   | -17.668 | -15.374 | 15.854              |
| B97M-V          | -28.669 | 2.135  | 25.043           | -3.626  | 0.000   | -15.374 | 11.748              |
| VV10            | -30.085 | 2.235  | 24.899           | -5.186  | 0.000   | -15.374 | 10.188              |
| MM              | -26.011 | 10.980 | 11.677           | -14.334 | 0.000   | -15.374 | 1.040               |

  

| Hydroxyaniline  | E       | G_solv | G_solv_corrected | G_bind  | Emp_Dis | Entropy | G_bind_with_Entropy |
|-----------------|---------|--------|------------------|---------|---------|---------|---------------------|
| PBE+ONETEP_DISP | -34.885 | 7.432  | 30.488           | -4.398  | -25.196 | -15.232 | 10.835              |
| PBE_bj          | -32.997 | 7.432  | 30.488           | -2.509  | -23.308 | -15.232 | 12.723              |
| PBE_bjm         | -32.088 | 7.432  | 30.488           | -1.600  | -22.399 | -15.232 | 13.632              |
| PBE_zero        | -34.552 | 7.432  | 30.488           | -4.064  | -24.862 | -15.232 | 11.168              |
| PBE_old         | -33.151 | 7.432  | 30.488           | -2.663  | -23.461 | -15.232 | 12.570              |
| PBE_zerom       | -30.770 | 7.432  | 30.488           | -0.282  | -21.080 | -15.232 | 14.951              |
| PBE_elstner     | -34.885 | 7.432  | 30.488           | -4.398  | -25.196 | -15.232 | 10.835              |
| PBE_bj_abc      | -30.605 | 7.432  | 30.488           | -0.118  | -20.916 | -15.232 | 15.115              |
| PBE_bjm_abc     | -29.696 | 7.432  | 30.488           | 0.791   | -20.007 | -15.232 | 16.024              |
| B97M-V          | -37.042 | 7.455  | 32.466           | -4.576  | 0.000   | -15.232 | 10.656              |
| VV10            | -38.073 | 6.881  | 31.471           | -6.601  | 0.000   | -15.232 | 8.631               |
| MM              | -33.515 | 19.984 | 20.608           | -12.907 | 0.000   | -15.232 | 2.326               |

## 2.6.2 Ligand Set B

| Phenol          | E       | G_solv | G_solv_corrected | G_bind  | Emp_Dis | Entropy | G_bind_with_Entropy |
|-----------------|---------|--------|------------------|---------|---------|---------|---------------------|
| PBE+ONETEP_DISP | -28.285 | 3.251  | 24.375           | -3.909  | -22.276 | -14.213 | 10.304              |
| PBE_bj          | -26.504 | 3.251  | 24.375           | -2.128  | -20.495 | -14.213 | 12.085              |
| PBE_bjm         | -25.728 | 3.251  | 24.375           | -1.352  | -19.719 | -14.213 | 12.861              |
| PBE_zero        | -27.867 | 3.251  | 24.375           | -3.491  | -21.858 | -14.213 | 10.722              |
| PBE_old         | -26.359 | 3.251  | 24.375           | -1.984  | -20.351 | -14.213 | 12.229              |
| PBE_zerom       | -24.570 | 3.251  | 24.375           | -0.195  | -18.561 | -14.213 | 14.018              |
| PBE_elstner     | -28.285 | 3.251  | 24.375           | -3.909  | -22.276 | -14.213 | 10.304              |
| PBE_bj_abc      | -24.382 | 3.251  | 24.375           | -0.006  | -18.373 | -14.213 | 14.207              |
| PBE_bjm_abc     | -23.606 | 3.251  | 24.375           | 0.770   | -17.597 | -14.213 | 14.982              |
| MM              | -25.841 | 14.471 | 15.045           | -10.797 | 0.000   | -14.213 | 3.416               |
| GFN2-XTB        | -16.241 | 7.257  | 7.257            | -12.463 | 0.000   | -14.213 | 1.750               |
| GFN-FF          | -21.721 | 11.993 | 11.993           | -18.152 | 0.000   | -14.213 | -3.940              |

| Catechol        | E       | G_solv | G_solv_corrected | G_bind  | Emp_Dis | Entropy | G_bind_with_Entropy |
|-----------------|---------|--------|------------------|---------|---------|---------|---------------------|
| PBE+ONETEP_DISP | -36.454 | 7.006  | 29.721           | -6.733  | -23.467 | -14.782 | 8.049               |
| PBE_bj          | -34.836 | 7.006  | 29.721           | -5.115  | -21.849 | -14.782 | 9.667               |
| PBE_bjm         | -34.040 | 7.006  | 29.721           | -4.318  | -21.053 | -14.782 | 10.463              |
| PBE_zero        | -36.350 | 7.006  | 29.721           | -6.628  | -23.363 | -14.782 | 8.153               |
| PBE_old         | -34.655 | 7.006  | 29.721           | -4.934  | -21.668 | -14.782 | 9.848               |
| PBE_zerom       | -32.799 | 7.006  | 29.721           | -3.078  | -19.812 | -14.782 | 11.704              |
| PBE_elstner     | -36.454 | 7.006  | 29.721           | -6.733  | -23.467 | -14.782 | 8.049               |
| PBE_bj_abc      | -32.631 | 7.006  | 29.721           | -2.909  | -19.643 | -14.782 | 11.872              |
| PBE_bjm_abc     | -31.834 | 7.006  | 29.721           | -2.113  | -18.847 | -14.782 | 12.669              |
| MM              | -35.770 | 25.612 | 26.201           | -9.570  | 0.000   | -14.782 | 5.212               |
| GFN2-XTB        | -22.762 | 9.611  | 9.611            | -18.013 | 0.000   | -14.782 | -3.232              |
| GFN-FF          | -26.716 | 16.400 | 16.400           | -22.162 | 0.000   | -14.782 | -7.380              |
| Methylphenol    | E       | G_solv | G_solv_corrected | G_bind  | Emp_Dis | Entropy | G_bind_with_Entropy |
| PBE+ONETEP_DISP | -30.811 | 2.255  | 23.961           | -6.850  | -24.130 | -15.459 | 8.609               |
| PBE_bj          | -28.986 | 2.255  | 23.961           | -5.025  | -22.305 | -15.459 | 10.435              |
| PBE_bjm         | -28.031 | 2.255  | 23.961           | -4.069  | -21.350 | -15.459 | 11.390              |
| PBE_zero        | -30.697 | 2.255  | 23.961           | -6.736  | -24.016 | -15.459 | 8.723               |
| PBE_old         | -28.633 | 2.255  | 23.961           | -4.672  | -21.952 | -15.459 | 10.788              |
| PBE_zerom       | -26.813 | 2.255  | 23.961           | -2.852  | -20.132 | -15.459 | 12.608              |
| PBE_elstner     | -30.811 | 2.255  | 23.961           | -6.850  | -24.130 | -15.459 | 8.609               |
| PBE_bj_abc      | -26.612 | 2.255  | 23.961           | -2.650  | -19.931 | -15.459 | 12.809              |
| PBE_bjm_abc     | -25.656 | 2.255  | 23.961           | -1.695  | -18.975 | -15.459 | 13.764              |
| MM              | -28.478 | 14.738 | 15.491           | -12.986 | 0.000   | -15.459 | 2.473               |
| GFN2-XTB        | -17.800 | 7.362  | 7.362            | -13.763 | 0.000   | -15.459 | 1.696               |
| GFN-FF          | -23.628 | 12.281 | 12.281           | -19.670 | 0.000   | -15.459 | -4.211              |
| Fluoroaniline   | E       | G_solv | G_solv_corrected | G_bind  | Emp_Dis | Entropy | G_bind_with_Entropy |
| PBE+ONETEP_DISP | -27.287 | 2.401  | 23.296           | -3.990  | -22.554 | -15.142 | 11.151              |
| PBE_bj          | -25.497 | 2.401  | 23.296           | -2.200  | -20.764 | -15.142 | 12.941              |
| PBE_bjm         | -24.656 | 2.401  | 23.296           | -1.359  | -19.923 | -15.142 | 13.782              |
| PBE_zero        | -27.103 | 2.401  | 23.296           | -3.806  | -22.370 | -15.142 | 11.335              |
| PBE_old         | -25.620 | 2.401  | 23.296           | -2.323  | -20.887 | -15.142 | 12.818              |
| PBE_zerom       | -23.518 | 2.401  | 23.296           | -0.221  | -18.785 | -15.142 | 14.920              |
| PBE_elstner     | -27.287 | 2.401  | 23.296           | -3.990  | -22.554 | -15.142 | 11.151              |
| PBE_bj_abc      | -23.382 | 2.401  | 23.296           | -0.086  | -18.650 | -15.142 | 15.056              |
| PBE_bjm_abc     | -22.541 | 2.401  | 23.296           | 0.755   | -17.809 | -15.142 | 15.897              |
| MM              | -26.212 | 11.083 | 11.772           | -14.440 | 0.000   | -15.142 | 0.701               |
| GFN2-XTB        | -15.508 | 7.807  | 7.807            | -12.395 | 0.000   | -15.142 | 2.747               |
| GFN-FF          | -21.940 | 17.776 | 17.776           | -17.535 | 0.000   | -15.142 | -2.393              |

| Hydroxyaniline  | E       | G_solv | G_solv_corrected | G_bind  | Emp_Disp | Entropy | G_bind_with_Entropy |
|-----------------|---------|--------|------------------|---------|----------|---------|---------------------|
| PBE+ONETEP_DISP | -35.076 | 7.526  | 30.641           | -4.436  | -25.267  | -15.576 | 11.140              |
| PBE_bj          | -33.171 | 7.526  | 30.641           | -2.530  | -23.362  | -15.576 | 13.046              |
| PBE_bjm         | -32.265 | 7.526  | 30.641           | -1.625  | -22.457  | -15.576 | 13.951              |
| PBE_zero        | -34.720 | 7.526  | 30.641           | -4.079  | -24.911  | -15.576 | 11.497              |
| PBE_old         | -33.359 | 7.526  | 30.641           | -2.718  | -23.550  | -15.576 | 12.858              |
| PBE_zerom       | -30.942 | 7.526  | 30.641           | -0.301  | -21.133  | -15.576 | 15.275              |
| PBE_elstner     | -35.076 | 7.526  | 30.641           | -4.436  | -25.267  | -15.576 | 11.140              |
| PBE_bj_abc      | -30.771 | 7.526  | 30.641           | -0.131  | -20.963  | -15.576 | 15.445              |
| PBE_bjm_abc     | -29.866 | 7.526  | 30.641           | 0.774   | -20.057  | -15.576 | 16.350              |
| MM              | -33.652 | 19.911 | 20.527           | -13.126 | 0.000    | -15.576 | 2.450               |
| GFN2-XTB        | -20.122 | 11.469 | 11.469           | -15.483 | 0.000    | -15.576 | 0.094               |
| GFN-FF          | -27.882 | 18.434 | 18.434           | -22.752 | 0.000    | -15.576 | -7.176              |
| Toluene         | E       | G_solv | G_solv_corrected | G_bind  | Emp_Disp | Entropy | G_bind_with_Entropy |
| PBE+ONETEP_DISP | -21.028 | -2.952 | 17.958           | -3.070  | -23.794  | -14.389 | 11.319              |
| PBE_bj          | -18.596 | -2.952 | 17.958           | -0.638  | -21.362  | -14.389 | 13.751              |
| PBE_bjm         | -17.704 | -2.952 | 17.958           | 0.254   | -20.470  | -14.389 | 14.643              |
| PBE_zero        | -20.043 | -2.952 | 17.958           | -2.084  | -22.808  | -14.389 | 12.305              |
| PBE_old         | -18.604 | -2.952 | 17.958           | -0.646  | -21.370  | -14.389 | 13.743              |
| PBE_zerom       | -16.540 | -2.952 | 17.958           | 1.418   | -19.305  | -14.389 | 15.807              |
| PBE_elstner     | -21.028 | -2.952 | 17.958           | -3.070  | -23.794  | -14.389 | 11.319              |
| PBE_bj_abc      | -16.431 | -2.952 | 17.958           | 1.527   | -19.197  | -14.389 | 15.916              |
| PBE_bjm_abc     | -15.539 | -2.952 | 17.958           | 2.419   | -18.305  | -14.389 | 16.808              |
| MM              | -19.244 | 5.566  | 6.319            | -12.925 | 0.000    | -14.389 | 1.464               |
| GFN2-XTB        | -10.713 | 3.070  | 3.070            | -8.309  | 0.000    | -14.389 | 6.080               |
| GFN-FF          | -18.388 | 8.154  | 8.154            | -15.696 | 0.000    | -14.389 | -1.307              |
| Chlorophenol    | E       | G_solv | G_solv_corrected | G_bind  | Emp_Disp | Entropy | G_bind_with_Entropy |
| PBE+ONETEP_DISP | -31.278 | 3.044  | 26.119           | -5.159  | -24.061  | -14.131 | 8.972               |
| PBE_bj          | -30.218 | 3.044  | 26.119           | -4.099  | -23.000  | -14.131 | 10.032              |
| PBE_bjm         | -29.643 | 3.044  | 26.119           | -3.524  | -22.425  | -14.131 | 10.607              |
| PBE_zero        | -31.696 | 3.044  | 26.119           | -5.576  | -24.478  | -14.131 | 8.554               |
| PBE_old         | -29.630 | 3.044  | 26.119           | -3.511  | -22.412  | -14.131 | 10.620              |
| PBE_zerom       | -28.172 | 3.044  | 26.119           | -2.052  | -20.954  | -14.131 | 12.078              |
| PBE_elstner     | -31.278 | 3.044  | 26.119           | -5.159  | -24.061  | -14.131 | 8.972               |
| PBE_bj_abc      | -27.889 | 3.044  | 26.119           | -1.770  | -20.671  | -14.131 | 12.361              |
| PBE_bjm_abc     | -27.314 | 3.044  | 26.119           | -1.195  | -20.096  | -14.131 | 12.936              |
| MM              | -29.617 | 14.223 | 14.917           | -14.701 | 0.000    | -14.131 | -0.570              |
| GFN2-XTB        | -19.408 | 6.991  | 6.991            | -15.185 | 0.000    | -14.131 | -1.055              |
| GFN-FF          | -25.781 | 12.126 | 12.126           | -21.559 | 0.000    | -14.131 | -7.428              |

## References

- <sup>1</sup>J. C. Prentice, J. Aarons, J. C. Womack, A. E. Allen, L. Andrinopoulos, L. Anton, R. A. Bell, A. Bhandari, G. A. Bramley, R. J. Charlton, R. J. Clements, D. J. Cole, G. Constantinescu, F. Corsetti, S. M. Dubois, K. K. Duff, J. M. Escartín, A. Greco, Q. Hill, L. P. Lee, E. Linscott, D. D. O'Regan, M. J. Phipps, L. E. Ratcliff, Á. R. Serrano, E. W. Tait, G. Teobaldi, V. Vitale, N. Yeung, T. J. Zuehlsdorff, J. Dziedzic, P. D. Haynes, N. D. Hine, A. A. Mostofi, M. C. Payne, and C. K. Skylaris, “The ONETEP linear-scaling density functional theory program”, *The Journal of Chemical Physics* **152**, 174111 (2020).
- <sup>2</sup>J. Dziedzic, H. H. Helal, C. K. Skylaris, A. A. Mostofi, and M. C. Payne, “Minimal parameter implicit solvent model for ab initio electronic-structure calculations”, *EPL* **95**, 43001 (2011).
- <sup>3</sup>S. Genheden, J. Kongsted, P. Söderhjelm, and U. Ryde, “Nonpolar solvation free energies of protein-ligand complexes”, *Journal of Chemical Theory and Computation* **6**, 3558–3568 (2010).
- <sup>4</sup>S. J. Fox, J. Dziedzic, T. Fox, C. S. Tautermann, and C. K. Skylaris, “Density functional theory calculations on entire proteins for free energies of binding: Application to a model polar binding site”, *Proteins: Structure, Function and Bioinformatics* **82**, 3335–3346 (2014).
- <sup>5</sup>W. A. Baase, L. Liu, D. E. Tronrud, and B. W. Matthews, *Lessons from the lysozyme of phage T4*, Vol. 19, 4 (Wiley-Blackwell, Apr. 2010), pp. 631–641.
